# Supplementary material
Source: publisher figshare collection journal article supplement (https://sage.figshare.com/ndownloader/files/15564164)
Supplement: Supplementary file 1 [file 15564164]

**Appendix A: Personality Questions**

Items included in the British survey to measure the five personality traits

Q28 Here are a number of characteristics that may or may not apply to you. For example, do you agree or disagree that you are someone who likes to spend time with others? Please indicate the extent to which you agree or disagree with each statement below. Are you someone who...

All items included five Likert-type answering categories (ranging from fully disagree to fully agree).

|  | Personality trait | Factor loading1 |
| --- | --- | --- |
| Is talkative | Extraversion | 0.656 |
| Tends to find fault with others | Agreeableness (R)2 | 0.666 |
| Is depressed, blue | Emotional stability | 0.463 |
| Is original, comes up with new ideas | Openness | 0.512 |
| Is helpful and unselfish with others | Agreeableness | 0.440 |
| Can be somewhat careless | Conscientiousness (R) | 0.494 |
| Is relaxed, handles stress well | Emotional stability (R) | 0.690 |
| Is full of energy | Extraversion | 0.550 |
| Starts quarrels with others | Agreeableness (R) | 0.466 |
| Can be tense | Emotional stability | 0.538 |
| Generates a lot of enthusiasm | Extraversion | 0.554 |
| Has a forgiving nature | Agreeableness | 0.463 |
| Tends to be disorganised | Conscientiousness (R) | 0.663 |
| Worries a lot | Emotional stability | 0.588 |
| Tends to be quiet | Extraversion (R) | 0.681 |
| Tends to be lazy | Conscientiousness (R) | 0.372 |
| Is inventive | Openness | 0.359 |
| Perseveres until the task is finished | Conscientiousness | 0.277 |
| Values artistic, aesthetic experiences | Openness | 0.778 |
| Is considerate and kind to almost everyone | Agreeableness | 0.622 |
| Does things efficiently | Conscientiousness | 0.799 |
| Is sophisticated in art, music, or literature | Openness | 0.720 |

1Principal Factor Analysis

2R indicates that the question values has been reversed

Items included in the Danish Survey to measure the five personality traits

All items included five Likert-type answering categories (ranging from fully disagree to fully agree).

|  | Personality trait | Factor loading1 |
| --- | --- | --- |
| Controversial lecturers only confuse and misguide students | Openness(R)2 | 0.291 |
| Rarely experience strong feelings‎/emotions | Openness (R) | 0.081 |
| Philosophical discussions are boring | Openness (R) | 0.433 |
| I have a lively fantasy [imagination] | Openness | 0.570 |
| Often try new and unfamiliar food | Openness | 0.539 |
| Other peoples' perception of right and wring can be right‎/valid for them | Openness | 0.386 |
| Enjoy to concentrate on a fantasy or daydream and let it grow | Openness | 0.440 |
| Poetry does not speak to me | Openness (R) | 0.588 |
| Most comfortable in familiar surroundings | Openness (R) | 0.430 |
| Little interest in speculating about mysteries of the universe or conditions of man kind | Openness (R) | 0.613 |
| Sometimes when reading a poem or looking at art I feel a puff of pitch‎/excitement | Openness | 0.565 |
| Strangest things - e.g. special scents or names of distant places -- invoke strong emotions | Openness | 0.340 |
| Known for judgment and common sense | Conscientiousness | 0.127 |
| Sometimes not as reliable as I ought to be | Conscientiousness (R) | 0.530 |
| Clear goals and work systematically to achieve them | Conscientiousness | 0.678 |
| Think things through before deciding | Conscientiousness | 0.302 |
| Not methodical and systematic person | Conscientiousness (R) | 0.597 |
| Productive person who always get my work done | Conscientiousness | 0.795 |
| Often situations where I am not properly prepared | Conscientiousness (R) | 0.613 |
| Work hard to achieve my goals | Conscientiousness | 0.669 |
| Hard to pull myself together and do things I ought to | Conscientiousness (R) | 0.617 |
| Always consider consequences before I act | Conscientiousness | 0.400 |
| Apparently never able to organize my things | Conscientiousness (R) | 0.391 |
| Try to be careful so I don't have to redo things | Conscientiousness | 0.503 |
| Like to have people around me | Extraversion | 0.754 |
| Let others talk at meetings | Extraversion (R) | 0.371 |
| Really like to talk with people | Extraversion | 0.574 |
| Not as quick and lively as other people | Extraversion (R) | 0.522 |
| Like to be the centre of attention | Extraversion | 0.513 |
| Easy to smile and be extrovert [outgoing] towards strangers | Extraversion | 0.688 |
| Happy and cheerful | Extraversion | 0.440 |
| Enjoy parties with a lot of people | Extraversion | 0.691 |
| Do not find it easy to take control of a situation | Extraversion (R) | 0.592 |
| A very active person | Extraversion | 0.563 |
| Like to be among the crowd at sports events | Extraversion | 0.271 |
| Have a ready laugh | Extraversion | 0.412 |
| Some think I am selfish and self-absorbed | Agreeableness (R) | 0.257 |
| Rather collaborate than compete with other people | Agreeableness | 0.088 |
| Don't mind bragging about my skills and achievements | Agreeableness (R) | 0.236 |
| If necessary manipulate people to get what I want | Agreeableness (R) | 0.420 |
| Most people will take advantage of you, if they can get away with it | Agreeableness (R) | 0.409 |
| Some consider me cold and calculating | Agreeableness (R) | 0.436 |
| I am better than most people and I know it | Agreeableness (R) | -0.136 |
| We can never do too much for old and poor | Agreeableness | -0.074 |
| All people deserve respect | Agreeableness | 0.302 |
| Inclined to think the best about people | Agreeableness | 0.418 |
| Sometimes pressure and flatter to make people do what I want them to | Agreeableness (R) | 0.511 |
| I am obstinate and stubborn | Agreeableness (R) | 0.420 |
| I am a balanced person | Emotional stability (R) | 0.510 |
| Sometimes I feel I am not good at anything | Emotional stability | 0.693 |
| I rarely feel anxious or uneasy | Emotional stability (R) | 0.662 |
| Rarely depressed or sad | Emotional stability (R) | 0.656 |
| Sometimes I feel so ashamed that I just want to disappear | Emotional stability | 0.457 |
| Under great pressure sometimes I feel like I am breaking down | Emotional stability | 0.717 |
| Often feel tense and nervous | Emotional stability | 0.723 |
| Compared to others I often feel inferior | Emotional stability | 0.546 |
| Hard for me to decide | Emotional stability | 0.561 |
| Sometimes I do impulsive things that I later regret | Emotional stability | 0.141 |
| Even small annoyances can make me frustrated | Emotional stability | 0.490 |
| I am always able to control myself [my feelings] | Emotional stability (R) | 0.215 |

1Principal Factor Analysis

2R refers to a reversed item
